# Supplementary material for: Identification of key amino acid residues in the hTGR5–nomilin interaction and construction of its binding model
Source: PubMed Central journal article supplement (PMC5464637; doi:10.1371/journal.pone.0179226), 2017-06-08

### Relative Luciferase Activity

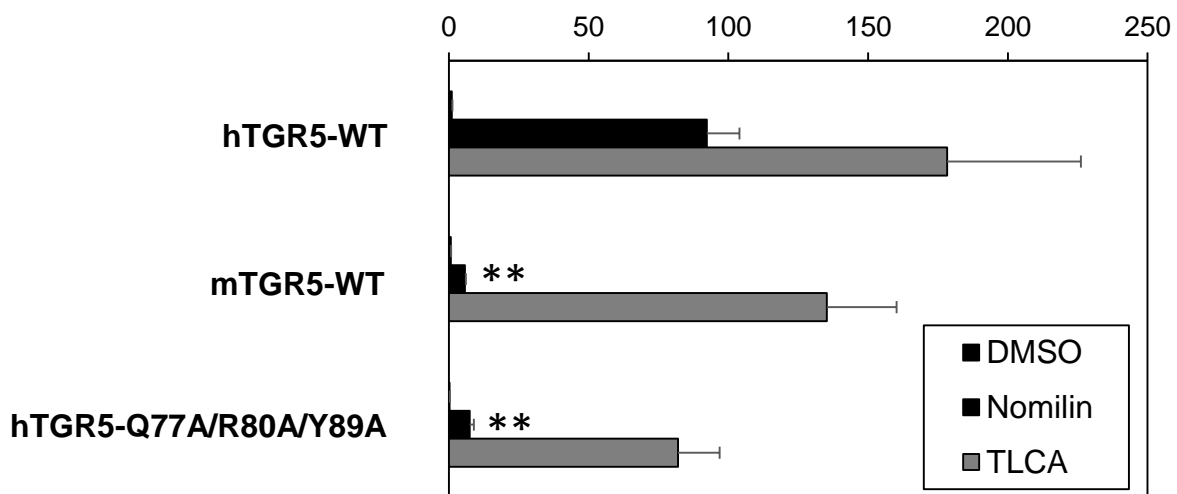

Supplement: pone.0179226.s002.pdf [file pone.0179226.s002.pdf]
