# Supplementary material for: Identification of key amino acid residues in the hTGR5–nomilin interaction and construction of its binding model
Source: PubMed Central journal article supplement (PMC5464637; doi:10.1371/journal.pone.0179226), 2017-06-08
Supplement: pone.0179226.s004.pdf [file pone.0179226.s004.pdf]

Table A. Construction of Chimera-1 and-2.

|           |                |   |         |                                                      |
|-----------|----------------|---|---------|------------------------------------------------------|
| chimera-1 | mTGR5(3-168)   | F | HindIII | 5'-ATAT AAGCTT ACA CCC AAC AGC ACT GAG CTG-3'        |
|           |                | R | Xbal    | 5'-ATAT TCTAGA TAGAGGTAGGGGGCT-3'                    |
|           | hTGR5(167-330) | F | Xbal    | 5'-ATAT TCTAGA AGTCTATGGGCTCCT-3'                    |
|           |                | R | BamHI   | 5'-ATAT GGATCC TTA GTT CAA GTC CAG GTC GAC ACT GC-3' |

|           |                |   |         |                                                     |
|-----------|----------------|---|---------|-----------------------------------------------------|
| chimera-2 | hTGR5(2-169)   | F | HindIII | 5'-ATAT AAGCTT ACG CCC AAC AGC ACT GGC GAG-3'       |
|           |                | R | Xbal    | 5'-ATAT TCTAGA TAGAGGTAGGGGGCT-3'                   |
|           | mTGR5(166-329) | F | Xbal    | 5'-ATAT TCTAGA AGTTTATGGCCTCCT-3'                   |
|           |                | R | BamHI   | 5'-ATAT GGATCC CTA ATT CAA GTC CAG GTC AAT GCT G-3' |

Template: WT-hTGR5, WT-mTGR5

Table B. Construction of Chimera-3 to -5

Forward primer (h) : 5'-ATAT AAGCTT ACGCCCAACAGCACTGGCGAG -3'

Reverse primer (m) : 5'-ATAT GGATCC CTAATTCAAGTCCAGGTCAATGCTG -3'

|           |         |                           |
|-----------|---------|---------------------------|
| Chimera-3 | Forward | 5'-GCCCGCTCTGGGCTGGAAC-3' |
|           | Reverse | 5'-GGTTCCAGCCCAGAGCGG-3'  |

|           |         |                          |
|-----------|---------|--------------------------|
| Chimera-4 | Forward | 5'-GCCCCCTGGGAGTGTGCG-3' |
|           | Reverse | 5'-GCCGCACACTCCCAGGGG-3' |

|           |         |                            |
|-----------|---------|----------------------------|
| Chimera-5 | Forward | 5'-CTTGCTGGTGCATGGGGAAC-3' |
|           | Reverse | 5'-CGTTCCCATGCACCAGCAAG-3' |

Template: WT-hTGR5, WT-mTGR5

Table C. Construction of Chimera-6

|           |             |                                                                               |
|-----------|-------------|-------------------------------------------------------------------------------|
| Chimera-6 | Forward     | 5'-ATATAAGCTTACACCCAACAGCACTGAGCTGTCGG<br>CCATTCCCATGGGGGTTCTGGGGCTCTCCCTG-3' |
|           | Reverse (m) | 5'-ATATGGATCCCTAATTCAAGTCCAGGTCAATGCTG-3'                                     |

Template: Chimera-5

Table D. Construction of Chimera-7 to -9.

Forward primer (m) : 5'-ATATAAGCTTACACCCAACAGCACTGAGCTG -3'

Reverse primer (m) : 5'-ATATGGATCCCTAATTCAAGTCCAGGTCAATGCTG -3'

|           |         |                            |
|-----------|---------|----------------------------|
| Chimera-7 | Forward | 5'-GCCCTGGACCGCCGCCTG -3'  |
|           | Reverse | 5'-CAGGCGGCGGTCCAGGGC-3'   |
| Chimera-8 | Forward | 5'-CATGCTGCCTGGGCTGTGG -3' |
|           | Reverse | 5'-CCACAGCCCAGGCAGCATG-3'  |
| Chimera-9 | Forward | 5'-GGGCTACTGGTCCTGCCTCC-3' |
|           | Reverse | 5'-GGAGGCAGGACCAGTAGCCC-3' |

Template: WT-mTGR5, Chimera-5

Table E. Primer set for mouse-to-human point mutated TGR5

|         |   |                                                     |
|---------|---|-----------------------------------------------------|
| HindIII | F | 5'-ATAT AAGCTT ACA CCC AAC AGC ACT GAG CTG-3'       |
| BamHI   | R | 5'-ATAT GGATCC CTA ATT CAA GTC CAG GTC AAT GCT G-3' |

|      |         |                                             |
|------|---------|---------------------------------------------|
| S75N | Forward | 5'-GGGCTATGGAACCGGAACCATC-3'                |
|      | Reverse | 5'-GATGGTTCCGGTTCCATAGCCC-3'                |
| R76Q | Forward | 5'-GCTATGGAGCCAGAACCATCAGG-3'               |
|      | Reverse | 5'-CCTGATGGTTCTGGCTCCATAGC-3'               |
| N77S | Forward | 5'-CTATGGAGCCGGAGTCATCAGGGC-3'              |
|      | Reverse | 5'-GCCCTGATGACTCCGGCTCCATAG-3'              |
| H78R | Forward | 5'-GAGCCGGAACCGCCAGGGCTACTG-3'              |
|      | Reverse | 5'-CAGTAGCCCTGGCGGTTCCGGCTC-3'              |
| Q79R | Forward | 5'-CGGAACCATCGGGGCTACTGG-3'                 |
|      | Reverse | 5'-CCAGTAGCCCCGATGGTTCCG-3'                 |
| L87V | Forward | 5'-GGTCCTGCCTCCTTGTCCACTTGACCCCCAACTTTTG-3' |
|      | Reverse | 5'-CAAAAGTTGGGGGTCAAGTGGACAAGGAGGCAGGACC-3' |
| H88Y | Forward | 5'-GGTCCTGCCTCCTTCTCTACTTGACCCCCAACTTTTG-3' |
|      | Reverse | 5'-CAAAAGTTGGGGGTCAAGTAGAGAAGGAGGCAGGACC-3' |
| T90A | Forward | 5'-CTCCACTTGGCTCCCAACTTTTG-3'               |
|      | Reverse | 5'-CAAAAGTTGGGAGCCAAGTGGAG-3'               |
| C94S | Forward | 5'-CCCAACTTTTCCTTCCTTCCCTG-3'               |
|      | Reverse | 5'-CAGGGAAAGGAAGGAAAAGTTGGG-3'              |

Table F. Primer set for human-to-mouse point mutated TGR5

|         |   |                                                      |
|---------|---|------------------------------------------------------|
| HindIII | F | 5'-ATAT AAGCTT ACG CCC AAC AGC ACT GGC GAG-3'        |
| BamHI   | R | 5'-ATAT GGATCC TTA GTT CAA GTC CAG GTC GAC ACT GC-3' |

|      |         |                                        |
|------|---------|----------------------------------------|
| Y89H | Forward | 5'-CCTGCCTCCTCGTCCACTTGGCTCCCAACTTC-3' |
|      | Reverse | 5'-GAAGTTGGGAGCCAAGTGGACGAGGAGGCAGG-3' |
| Q77R | Forward | 5'-CTGTGGAACCGGAGTCGCCG-3'             |
|      | Reverse | 5'-CGGCGACTCCGGTTCACAG-3'              |
| R80Q | Forward | 5'-CAGAGTCGCCAGGGTACTGG-3'             |
|      | Reverse | 5'-CCAGTAACCCTGGCGACTCTG-3'            |
